# Supplementary material for: Evaluating a potential model to analyze the function of the gut microbiota of the giant panda
Source: Front Microbiol. 2022 Dec 20;13:1086058. doi: 10.3389/fmicb.2022.1086058 (PMC9808404; doi:10.3389/fmicb.2022.1086058)
Supplement: SUPPLEMENTARY TABLE S2 — The statistical analysis of Shannon index between pairwise groups for giant panda (P) and horse (H) in Figure 1B. See Supplementary Table S1 for the group details. [file Table_2.XLSX]

## Sheet: table S2
Group-Group	Difference	p-value	sig.	LCL	UCL
H0-H1	75.5	0.0068	**	21.3319	129.668
H0-H10	44.3333	0.1189		-11.6113	100.278
H0-H11	23.5	0.3659		-27.8884	74.8884
H0-H12	16.75	0.5188		-34.6384	68.1384
H0-H2	62.5	0.0242	*	8.33186	116.668
H0-H3	52.875	0.0556	.	-1.29314	107.043
H0-H4	63.75	0.0216	*	9.58186	117.918
H0-H5	55.25	0.0457	*	1.08186	109.418
H0-H6	48.375	0.0794	.	-5.79314	102.543
H0-H7	49.5	0.0728	.	-4.66814	103.668
H0-H8	27.5	0.3157		-26.6681	81.6681
H0-H9	10	0.7146		-44.1681	64.1681
H0-P0	112	0.0016	**	43.4821	180.518
H0-P1	95.75	0.0007	***	41.5819	149.918
H0-P10	52	0.0597	.	-2.16814	106.168
H0-P11	82.75	0.0019	**	31.3616	134.138
H0-P12	61.9375	0.0187	*	10.5491	113.326
H0-P2	99	0.0005	***	44.8319	153.168
H0-P3	76.25	0.0063	**	22.0819	130.418
H0-P4	73.125	0.0087	**	18.9569	127.293
H0-P5	78.5	0.005	**	24.3319	132.668
H0-P6	60.75	0.0284	*	6.58186	114.918
H0-P7	60.75	0.0284	*	6.58186	114.918
H0-P8	71.25	0.0105	*	17.0819	125.418
H0-P9	38.25	0.164		-15.9181	92.4181
H1-H10	-31.1667	0.0977	.	-68.1706	5.83722
H1-H11	-52	0.0008	***	-81.6691	-22.3309
H1-H12	-58.75	0.0002	***	-88.4191	-29.0809
H1-H2	-13	0.4528		-47.2589	21.2589
H1-H3	-22.625	0.1928		-56.8839	11.6339
H1-H4	-11.75	0.4972		-46.0089	22.5089
H1-H5	-20.25	0.2433		-54.5089	14.0089
H1-H6	-27.125	0.1192		-61.3839	7.13394
H1-H7	-26	0.1351		-60.2589	8.25894
H1-H8	-48	0.0066	**	-82.2589	-13.7411
H1-H9	-65.5	0.0003	***	-99.7589	-31.2411
H1-P0	36.5	0.184		-17.6681	90.6681
H1-P1	20.25	0.2433		-14.0089	54.5089
H1-P10	-23.5	0.1763		-57.7589	10.7589
H1-P11	7.25	0.6284		-22.4191	36.9191
H1-P12	-13.5625	0.3661		-43.2316	16.1066
H1-P2	23.5	0.1763		-10.7589	57.7589
H1-P3	0.75	0.9654		-33.5089	35.0089
H1-P4	-2.375	0.8907		-36.6339	31.8839
H1-P5	3	0.8622		-31.2589	37.2589
H1-P6	-14.75	0.3945		-49.0089	19.5089
H1-P7	-14.75	0.3945		-49.0089	19.5089
H1-P8	-4.25	0.8058		-38.5089	30.0089
H1-P9	-37.25	0.0334	*	-71.5089	-2.99106
H10-H11	-20.8333	0.2102		-53.6338	11.9671
H10-H12	-27.5833	0.0982	.	-60.3838	5.21711
H10-H2	18.1667	0.3319		-18.8372	55.1705
H10-H3	8.54167	0.6475		-28.4622	45.5455
H10-H4	19.4167	0.2999		-17.5872	56.4205
H10-H5	10.9167	0.5591		-26.0872	47.9205
H10-H6	4.04167	0.8286		-32.9622	41.0455
H10-H7	5.16667	0.782		-31.8372	42.1705
H10-H8	-16.8333	0.3684		-53.8372	20.1705
H10-H9	-34.3333	0.0686	.	-71.3372	2.67055
H10-P0	67.6667	0.0183	*	11.722	123.611
H10-P1	51.4167	0.007	**	14.4128	88.4206
H10-P10	7.66667	0.6815		-29.3372	44.6705
H10-P11	38.4167	0.0222	*	5.61623	71.2171
H10-P12	17.6042	0.289		-15.1963	50.4046
H10-P2	54.6667	0.0042	**	17.6628	91.6706
H10-P3	31.9167	0.09	.	-5.08722	68.9206
H10-P4	28.7917	0.1256		-8.21222	65.7956
H10-P5	34.1667	0.0699	.	-2.83722	71.1706
H10-P6	16.4167	0.3803		-20.5872	53.4205
H10-P7	16.4167	0.3803		-20.5872	53.4205
H10-P8	26.9167	0.1518		-10.0872	63.9205
H10-P9	-6.08333	0.7446		-43.0872	30.9205
H11-H12	-6.75	0.5811		-30.9747	17.4747
H11-H2	39	0.0106	*	9.33089	68.6691
H11-H3	29.375	0.0523	.	-0.29411	59.0441
H11-H4	40.25	0.0084	**	10.5809	69.9191
H11-H5	31.75	0.0362	*	2.08089	61.4191
H11-H6	24.875	0.0992	.	-4.79411	54.5441
H11-H7	26	0.0851	.	-3.66911	55.6691
H11-H8	4	0.7894		-25.6691	33.6691
H11-H9	-13.5	0.3683		-43.1691	16.1691
H11-P0	88.5	0.0009	***	37.1116	139.888
H11-P1	72.25	0	***	42.5809	101.919
H11-P10	28.5	0.0595	.	-1.16911	58.1691
H11-P11	59.25	0	***	35.0253	83.4747
H11-P12	38.4375	0.0022	**	14.2128	62.6622
H11-P2	75.5	0	***	45.8309	105.169
H11-P3	52.75	0.0007	***	23.0809	82.4191
H11-P4	49.625	0.0013	**	19.9559	79.2941
H11-P5	55	0.0004	***	25.3309	84.6691
H11-P6	37.25	0.0145	*	7.58089	66.9191
H11-P7	37.25	0.0145	*	7.58089	66.9191
H11-P8	47.75	0.0019	**	18.0809	77.4191
H11-P9	14.75	0.3258		-14.9191	44.4191
H12-H2	45.75	0.0029	**	16.0809	75.4191
H12-H3	36.125	0.0176	*	6.45589	65.7941
H12-H4	47	0.0022	**	17.3309	76.6691
H12-H5	38.5	0.0116	*	8.83089	68.1691
H12-H6	31.625	0.037	*	1.95589	61.2941
H12-H7	32.75	0.0309	*	3.08089	62.4191
H12-H8	10.75	0.4734		-18.9191	40.4191
H12-H9	-6.75	0.6523		-36.4191	22.9191
H12-P0	95.25	0.0004	***	43.8616	146.638
H12-P1	79	0	***	49.3309	108.669
H12-P10	35.25	0.0204	*	5.58089	64.9191
H12-P11	66	0	***	41.7753	90.2247
H12-P12	45.1875	0.0004	***	20.9628	69.4122
H12-P2	82.25	0	***	52.5809	111.919
H12-P3	59.5	0.0001	***	29.8309	89.1691
H12-P4	56.375	0.0003	***	26.7059	86.0441
H12-P5	61.75	0.0001	***	32.0809	91.4191
H12-P6	44	0.0041	**	14.3309	73.6691
H12-P7	44	0.0041	**	14.3309	73.6691
H12-P8	54.5	0.0004	***	24.8309	84.1691
H12-P9	21.5	0.1534		-8.16911	51.1691
H2-H3	-9.625	0.578		-43.8839	24.6339
H2-H4	1.25	0.9424		-33.0089	35.5089
H2-H5	-7.25	0.6751		-41.5089	27.0089
H2-H6	-14.125	0.4147		-48.3839	20.1339
H2-H7	-13	0.4528		-47.2589	21.2589
H2-H8	-35	0.0453	*	-69.2589	-0.74106
H2-H9	-52.5	0.0031	**	-86.7589	-18.2411
H2-P0	49.5	0.0728	.	-4.66814	103.668
H2-P1	33.25	0.057	.	-1.00894	67.5089
H2-P10	-10.5	0.544		-44.7589	23.7589
H2-P11	20.25	0.1784		-9.41911	49.9191
H2-P12	-0.5625	0.97		-30.2316	29.1066
H2-P2	36.5	0.0371	*	2.24106	70.7589
H2-P3	13.75	0.4272		-20.5089	48.0089
H2-P4	10.625	0.5392		-23.6339	44.8839
H2-P5	16	0.3558		-18.2589	50.2589
H2-P6	-1.75	0.9194		-36.0089	32.5089
H2-P7	-1.75	0.9194		-36.0089	32.5089
H2-P8	8.75	0.613		-25.5089	43.0089
H2-P9	-24.25	0.163		-58.5089	10.0089
H3-H4	10.875	0.5297		-23.3839	45.1339
H3-H5	2.375	0.8907		-31.8839	36.6339
H3-H6	-4.5	0.7946		-38.7589	29.7589
H3-H7	-3.375	0.8452		-37.6339	30.8839
H3-H8	-25.375	0.1446		-59.6339	8.88394
H3-H9	-42.875	0.0148	*	-77.1339	-8.61606
H3-P0	59.125	0.0328	*	4.95686	113.293
H3-P1	42.875	0.0148	*	8.61606	77.1339
H3-P10	-0.875	0.9596		-35.1339	33.3839
H3-P11	29.875	0.0485	*	0.205888	59.5441
H3-P12	9.0625	0.5454		-20.6066	38.7316
H3-P2	46.125	0.0089	**	11.8661	80.3839
H3-P3	23.375	0.1786		-10.8839	57.6339
H3-P4	20.25	0.2433		-14.0089	54.5089
H3-P5	25.625	0.1407		-8.63394	59.8839
H3-P6	7.875	0.6489		-26.3839	42.1339
H3-P7	7.875	0.6489		-26.3839	42.1339
H3-P8	18.375	0.2893		-15.8839	52.6339
H3-P9	-14.625	0.3985		-48.8839	19.6339
H4-H5	-8.5	0.6232		-42.7589	25.7589
H4-H6	-15.375	0.3748		-49.6339	18.8839
H4-H7	-14.25	0.4106		-48.5089	20.0089
H4-H8	-36.25	0.0383	*	-70.5089	-1.99106
H4-H9	-53.75	0.0025	**	-88.0089	-19.4911
H4-P0	48.25	0.0802	.	-5.91814	102.418
H4-P1	32	0.0668	.	-2.25894	66.2589
H4-P10	-11.75	0.4972		-46.0089	22.5089
H4-P11	19	0.2065		-10.6691	48.6691
H4-P12	-1.8125	0.9036		-31.4816	27.8566
H4-P2	35.25	0.0439	*	0.99106	69.5089
H4-P3	12.5	0.4703		-21.7589	46.7589
H4-P4	9.375	0.5879		-24.8839	43.6339
H4-P5	14.75	0.3945		-19.5089	49.0089
H4-P6	-3	0.8622		-37.2589	31.2589
H4-P7	-3	0.8622		-37.2589	31.2589
H4-P8	7.5	0.6645		-26.7589	41.7589
H4-P9	-25.5	0.1426		-59.7589	8.75894
H5-H6	-6.875	0.691		-41.1339	27.3839
H5-H7	-5.75	0.7395		-40.0089	28.5089
H5-H8	-27.75	0.111		-62.0089	6.50894
H5-H9	-45.25	0.0102	*	-79.5089	-10.9911
H5-P0	56.75	0.0402	*	2.58186	110.918
H5-P1	40.5	0.0211	*	6.24106	74.7589
H5-P10	-3.25	0.8509		-37.5089	31.0089
H5-P11	27.5	0.0688	.	-2.16911	57.1691
H5-P12	6.6875	0.6553		-22.9816	36.3566
H5-P2	43.75	0.0129	*	9.49106	78.0089
H5-P3	21	0.2264		-13.2589	55.2589
H5-P4	17.875	0.3026		-16.3839	52.1339
H5-P5	23.25	0.1809		-11.0089	57.5089
H5-P6	5.5	0.7504		-28.7589	39.7589
H5-P7	5.5	0.7504		-28.7589	39.7589
H5-P8	16	0.3558		-18.2589	50.2589
H5-P9	-17	0.3267		-51.2589	17.2589
H6-H7	1.125	0.9481		-33.1339	35.3839
H6-H8	-20.875	0.2291		-55.1339	13.3839
H6-H9	-38.375	0.0286	*	-72.6339	-4.11606
H6-P0	63.625	0.0219	*	9.45686	117.793
H6-P1	47.375	0.0073	**	13.1161	81.6339
H6-P10	3.625	0.8339		-30.6339	37.8839
H6-P11	34.375	0.0237	*	4.70589	64.0441
H6-P12	13.5625	0.3661		-16.1066	43.2316
H6-P2	50.625	0.0042	**	16.3661	84.8839
H6-P3	27.875	0.1094		-6.38394	62.1339
H6-P4	24.75	0.1546		-9.50894	59.0089
H6-P5	30.125	0.084	.	-4.13394	64.3839
H6-P6	12.375	0.4747		-21.8839	46.6339
H6-P7	12.375	0.4747		-21.8839	46.6339
H6-P8	22.875	0.1879		-11.3839	57.1339
H6-P9	-10.125	0.5584		-44.3839	24.1339
H7-H8	-22	0.2052		-56.2589	12.2589
H7-H9	-39.5	0.0243	*	-73.7589	-5.24106
H7-P0	62.5	0.0242	*	8.33186	116.668
H7-P1	46.25	0.0087	**	11.9911	80.5089
H7-P10	2.5	0.885		-31.7589	36.7589
H7-P11	33.25	0.0285	*	3.58089	62.9191
H7-P12	12.4375	0.407		-17.2316	42.1066
H7-P2	49.5	0.0051	**	15.2411	83.7589
H7-P3	26.75	0.1243		-7.50894	61.0089
H7-P4	23.625	0.174		-10.6339	57.8839
H7-P5	29	0.0961	.	-5.25894	63.2589
H7-P6	11.25	0.5157		-23.0089	45.5089
H7-P7	11.25	0.5157		-23.0089	45.5089
H7-P8	21.75	0.2104		-12.5089	56.0089
H7-P9	-11.25	0.5157		-45.5089	23.0089
H8-H9	-17.5	0.3128		-51.7589	16.7589
H8-P0	84.5	0.0026	**	30.3319	138.668
H8-P1	68.25	0.0002	***	33.9911	102.509
H8-P10	24.5	0.1588		-9.75894	58.7589
H8-P11	55.25	0.0004	***	25.5809	84.9191
H8-P12	34.4375	0.0234	*	4.76839	64.1066
H8-P2	71.5	0.0001	***	37.2411	105.759
H8-P3	48.75	0.0058	**	14.4911	83.0089
H8-P4	45.625	0.0096	**	11.3661	79.8839
H8-P5	51	0.004	**	16.7411	85.2589
H8-P6	33.25	0.057	.	-1.00894	67.5089
H8-P7	33.25	0.057	.	-1.00894	67.5089
H8-P8	43.75	0.0129	*	9.49106	78.0089
H8-P9	10.75	0.5345		-23.5089	45.0089
H9-P0	102	0.0003	***	47.8319	156.168
H9-P1	85.75	0	***	51.4911	120.009
H9-P10	42	0.0169	*	7.74106	76.2589
H9-P11	72.75	0	***	43.0809	102.419
H9-P12	51.9375	0.0008	***	22.2684	81.6066
H9-P2	89	0	***	54.7411	123.259
H9-P3	66.25	0.0002	***	31.9911	100.509
H9-P4	63.125	0.0004	***	28.8661	97.3839
H9-P5	68.5	0.0001	***	34.2411	102.759
H9-P6	50.75	0.0041	**	16.4911	85.0089
H9-P7	50.75	0.0041	**	16.4911	85.0089
H9-P8	61.25	0.0006	***	26.9911	95.5089
H9-P9	28.25	0.1048		-6.00894	62.5089
P0-P1	-16.25	0.5525		-70.4181	37.9181
P0-P10	-60	0.0303	*	-114.168	-5.83186
P0-P11	-29.25	0.261		-80.6384	22.1384
P0-P12	-50.0625	0.0561	.	-101.451	1.32591
P0-P2	-13	0.6345		-67.1681	41.1681
P0-P3	-35.75	0.193		-89.9181	18.4181
P0-P4	-38.875	0.1573		-93.0431	15.2931
P0-P5	-33.5	0.2223		-87.6681	20.6681
P0-P6	-51.25	0.0634	.	-105.418	2.91814
P0-P7	-51.25	0.0634	.	-105.418	2.91814
P0-P8	-40.75	0.1385		-94.9181	13.4181
P0-P9	-73.75	0.0082	**	-127.918	-19.5819
P1-P10	-43.75	0.0129	*	-78.0089	-9.49106
P1-P11	-13	0.3862		-42.6691	16.6691
P1-P12	-33.8125	0.026	*	-63.4816	-4.14339
P1-P2	3.25	0.8509		-31.0089	37.5089
P1-P3	-19.5	0.261		-53.7589	14.7589
P1-P4	-22.625	0.1928		-56.8839	11.6339
P1-P5	-17.25	0.3197		-51.5089	17.0089
P1-P6	-35	0.0453	*	-69.2589	-0.74106
P1-P7	-35	0.0453	*	-69.2589	-0.74106
P1-P8	-24.5	0.1588		-58.7589	9.75894
P1-P9	-57.5	0.0013	**	-91.7589	-23.2411
P10-P11	30.75	0.0424	*	1.08089	60.4191
P10-P12	9.9375	0.5073		-19.7316	39.6066
P10-P2	47	0.0077	**	12.7411	81.2589
P10-P3	24.25	0.163		-10.0089	58.5089
P10-P4	21.125	0.2237		-13.1339	55.3839
P10-P5	26.5	0.1278		-7.75894	60.7589
P10-P6	8.75	0.613		-25.5089	43.0089
P10-P7	8.75	0.613		-25.5089	43.0089
P10-P8	19.25	0.2671		-15.0089	53.5089
P10-P9	-13.75	0.4272		-48.0089	20.5089
P11-P12	-20.8125	0.0913	.	-45.0372	3.41223
P11-P2	16.25	0.2793		-13.4191	45.9191
P11-P3	-6.5	0.6643		-36.1691	23.1691
P11-P4	-9.625	0.5208		-39.2941	20.0441
P11-P5	-4.25	0.7765		-33.9191	25.4191
P11-P6	-22	0.1441		-51.6691	7.66911
P11-P7	-22	0.1441		-51.6691	7.66911
P11-P8	-11.5	0.4431		-41.1691	18.1691
P11-P9	-44.5	0.0037	**	-74.1691	-14.8309
P12-P2	37.0625	0.015	*	7.39339	66.7316
P12-P3	14.3125	0.3403		-15.3566	43.9816
P12-P4	11.1875	0.4556		-18.4816	40.8566
P12-P5	16.5625	0.2702		-13.1066	46.2316
P12-P6	-1.1875	0.9368		-30.8566	28.4816
P12-P7	-1.1875	0.9368		-30.8566	28.4816
P12-P8	9.3125	0.5343		-20.3566	38.9816
P12-P9	-23.6875	0.1162		-53.3566	5.98161
P2-P3	-22.75	0.1903		-57.0089	11.5089
P2-P4	-25.875	0.1369		-60.1339	8.38394
P2-P5	-20.5	0.2375		-54.7589	13.7589
P2-P6	-38.25	0.0291	*	-72.5089	-3.99106
P2-P7	-38.25	0.0291	*	-72.5089	-3.99106
P2-P8	-27.75	0.111		-62.0089	6.50894
P2-P9	-60.75	0.0007	***	-95.0089	-26.4911
P3-P4	-3.125	0.8566		-37.3839	31.1339
P3-P5	2.25	0.8964		-32.0089	36.5089
P3-P6	-15.5	0.371		-49.7589	18.7589
P3-P7	-15.5	0.371		-49.7589	18.7589
P3-P8	-5	0.7724		-39.2589	29.2589
P3-P9	-38	0.0301	*	-72.2589	-3.74106
P4-P5	5.375	0.7559		-28.8839	39.6339
P4-P6	-12.375	0.4747		-46.6339	21.8839
P4-P7	-12.375	0.4747		-46.6339	21.8839
P4-P8	-1.875	0.9136		-36.1339	32.3839
P4-P9	-34.875	0.0461	*	-69.1339	-0.61606
P5-P6	-17.75	0.306		-52.0089	16.5089
P5-P7	-17.75	0.306		-52.0089	16.5089
P5-P8	-7.25	0.6751		-41.5089	27.0089
P5-P9	-40.25	0.0218	*	-74.5089	-5.99106
P6-P7	0	1		-34.2589	34.2589
P6-P8	10.5	0.544		-23.7589	44.7589
P6-P9	-22.5	0.1952		-56.7589	11.7589
P7-P8	10.5	0.544		-23.7589	44.7589
P7-P9	-22.5	0.1952		-56.7589	11.7589
P8-P9	-33	0.0588	.	-67.2589	1.25894
